# Supplementary material for: A comparative study of the mechanical, shape-memory, and degradation properties of poly(lactic acid) nanofiber and cellulose nanocrystal reinforced poly(mannitol sebacate) nanocomposites
Source: Royal Society of Chemistry journal article supplement (doi:10.1039/c7ra01256j), 2017-01-01
Supplement: c7ra01256j1.pdf [file c7ra01256j1.pdf]

## Supporting Information

### **A comparative study of the mechanical, shape-memory, and degradation properties of poly(lactic acid) nanofibers and cellulose nanocrystals reinforced Poly(mannitol sebacate) nanocomposites**

*Águeda Sonseca<sup>1\*</sup>, Olivia Menes<sup>2</sup>, and Enrique Giménez<sup>1</sup>*

<sup>1</sup>Instituto de Tecnología de Materiales, Universidad Politécnica de Valencia (UPV),  
Camino de Vera s/nº, 46022 Valencia (SPAIN)

<sup>2</sup>Instituto Tecnológico del Plástico (AIMPLAS), Parque Tecnológico, Calle Gustave  
Eiffel 4, 46980, Paterna, Valencia (Spain)

## 1. Scanning electron microscopy

The morphology of PMS/NF-PLA nanocomposites was studied by scanning electron microscopy (SEM). **Figure S1** shows representative SEM images for the cross-section of PMS nanocomposites with 4 and 10 wt% of PLA nanofiber contents.

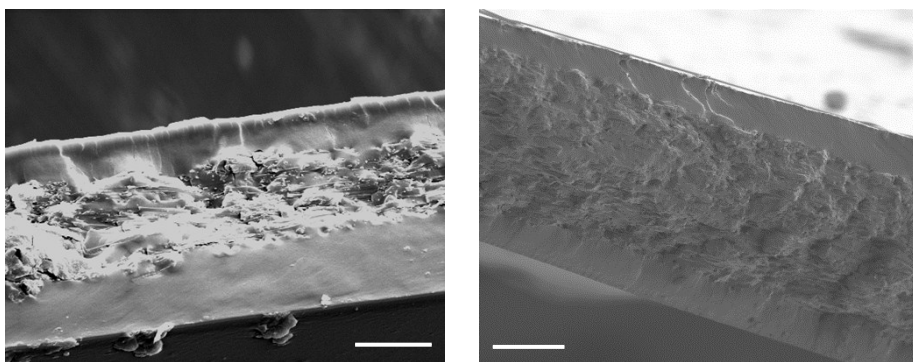

**Figure S1.** Left to right, cross-sectional SEM for PMS/NFPLA 4 wt% and 10 wt% nanocomposites (scale bars 20  $\mu\text{m}$ ).

## 2. Differential scanning calorimetry

The thermal behavior for PMS/NF-PLA nanocomposites was studied in a Mettler-Toledo DSC 800 under  $\text{N}_2$  atmosphere. Samples were heated from  $-60$  to  $180$   $^{\circ}\text{C}$ , cooled down to  $-60$   $^{\circ}\text{C}$  and heated again to  $180$   $^{\circ}\text{C}$  at a heating/cooling rate of  $10$   $^{\circ}\text{C}/\text{min}$  under an  $\text{N}_2$  atmosphere. **Figure S2a** evidences a melting peak in the PMS/NF-PLA samples due to the infiltration of the PLA mats. Glass transition temperature of the PLA at  $65$   $^{\circ}\text{C}$  is clearly evident for the nanocomposite with 15 wt% of nanofibers.

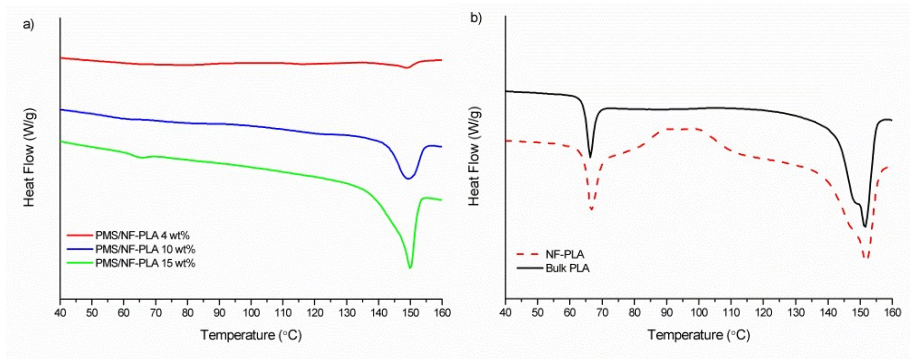

**Figure S2.** First heating run thermograms for PMS/NF-PLA nanocomposites **(a)**, and for electrospun PLA nanofibers and bulk PLA **(b)**.

### 3. Dynamic Mechanical Thermal Analysis (DMTA)

**Figure S3** shows Tan Delta peaks for PMS/CNC and PMS/NF-PLA nanocomposites evidencing a second peak in the nanofiber nanocomposites due to the NF-PLA presence.

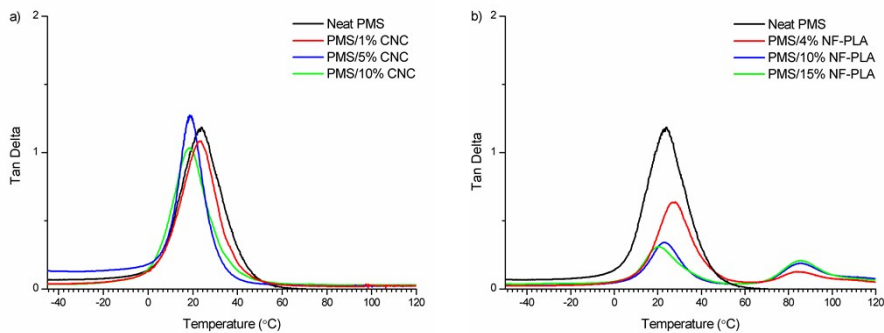

**Figure S3.** DMTA delta tangent curves as a function of temperature for neat PMS and PMS/CNC nanocomposites **(a)** and neat PMS and PMS/NF-PLA nanocomposites **(b)**.

#### 4. Thermally Activated Shape-Memory Properties

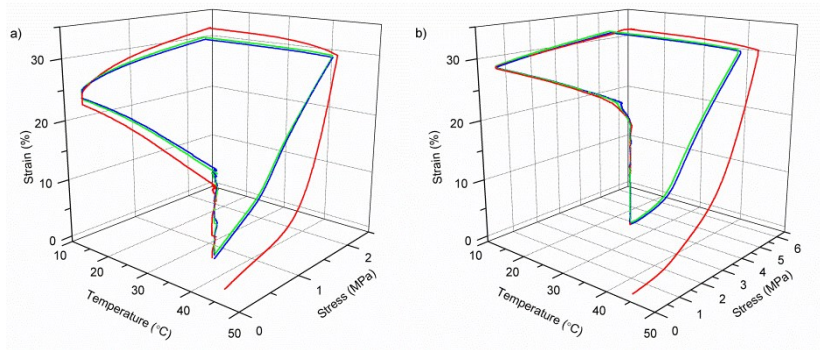

**Figure S4.** Shape-memory stress-strain-temperature curves of consecutive cycles for; PMS/NF-PLA 4 wt% nanocomposite (a) and PMS/NF-PLA 15 wt% nanocomposite (b).
